# Supplementary material for: Nb2O5/graphene nanocomposites for electrochemical energy storage
Source: Royal Society of Chemistry journal article supplement (doi:10.1039/c5ra07895d), 2015-01-01
Supplement: c5ra07895d1.pdf [file c5ra07895d1.pdf]

## Supporting Information

### **Nb<sub>2</sub>O<sub>5</sub>/Graphene nanocomposites for Electrochemical Energy Storage**

*Paulraj Arunkumar, Ajithan G. Ashish, Binson Babu, Som Sarang, Abhin Suresh, Chithra H. Sharma, Madhu Thalakulam and Manikoth M. Shaijumon\**

*School of Physics, Indian Institute of Science Education and Research Thiruvananthapuram,  
CET Campus, Sreekaryam, Thiruvananthapuram, Kerala, India 695 016  
Corresponding author: [shaiju@iisertvm.ac.in](mailto:shaiju@iisertvm.ac.in)*

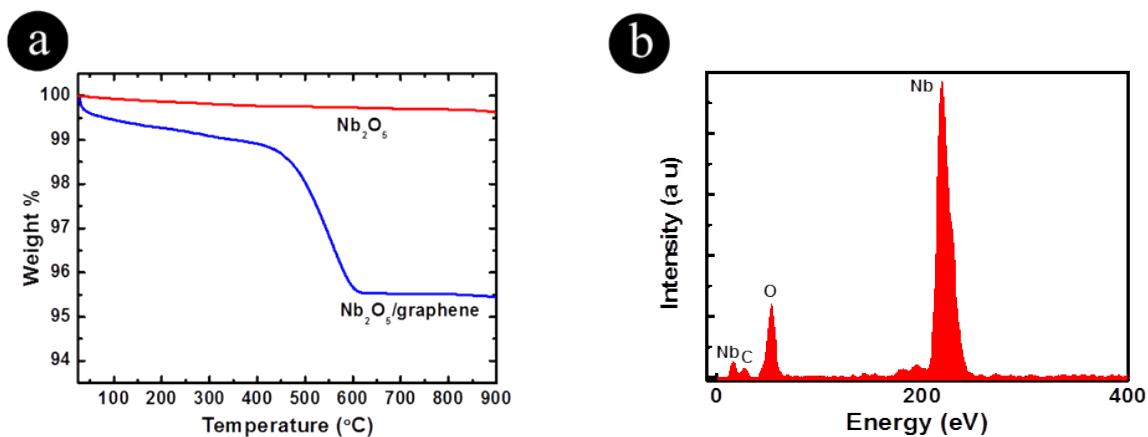

**Fig. S1** (a) Thermogravimetric analysis of  $\text{Nb}_2\text{O}_5$  nanocrystals and  $\text{Nb}_2\text{O}_5/\text{Graphene}$  nanocomposite (b) EDX spectra showing the presence of C, Nb and O.

Thermogravimetric analysis (Fig. S1a) was carried out on the  $\text{Nb}_2\text{O}_5/\text{Graphene}$  nanocomposite to determine the amount of graphene present in the composite. Thermogravimetric analysis was carried out in the presence of oxygen from room temperature to 900 °C at heating rate of 10 °C per min. The percentage of graphene in the nanocomposite was found to be 4.5% by weight. EDX measurement has been carried out to confirm the elements present in the sample (Fig. S1b).

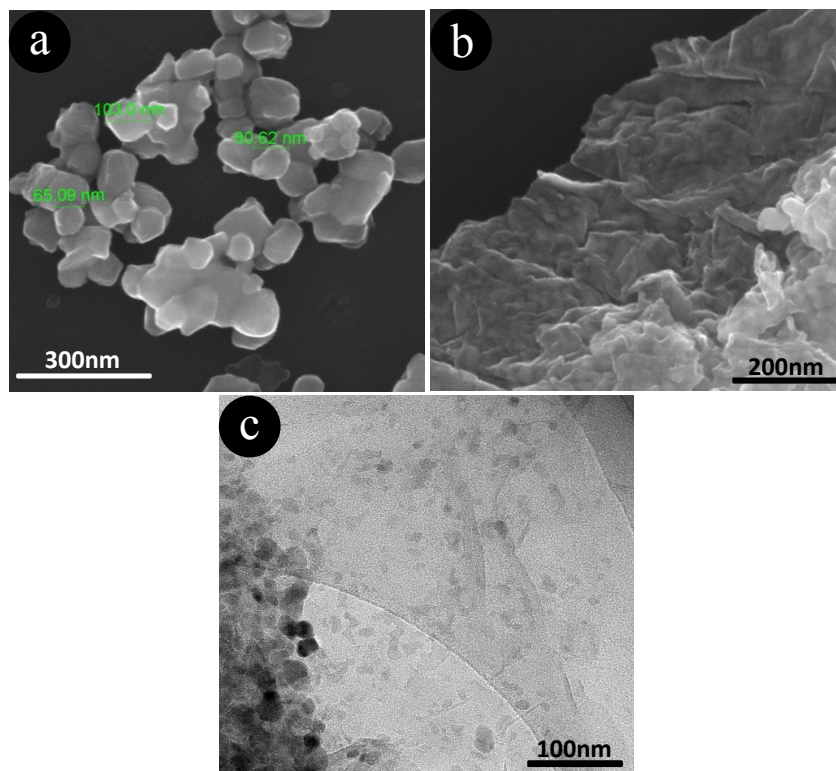

**Fig. S2** SEM images showing (a) the clustered nature and sizes of pristine Nb<sub>2</sub>O<sub>5</sub> nanoparticles (b) Nb<sub>2</sub>O<sub>5</sub>/graphene nanocomposite and (c) TEM image of Nb<sub>2</sub>O<sub>5</sub>/graphene nanocomposite.

The SEM image of pristine Nb<sub>2</sub>O<sub>5</sub> nanoparticles showed irregular and highly clustered particles varying in sizes in the range of 50-100 nm. Most of the particles were found to be large size (>100 nm) as shown in the Fig. S2a. When the nanocomposite was synthesized, graphene oxide nanosheets were introduced along with the precursors for Nb<sub>2</sub>O<sub>5</sub> nanoparticles. Due to the synergic effect, the Nb<sub>2</sub>O<sub>5</sub> nanoparticles formed were much smaller than that of the pristine. SEM image of the graphene composite are shown in the manuscript (Fig. 3b) and here as well (Fig. S2b). The variation in Nb<sub>2</sub>O<sub>5</sub> nanoparticle sizes can be seen from the TEM images shown in the manuscript (Fig. 3d) and here (Fig. S2c). This also resulted in higher lithiation capacity in the Nb<sub>2</sub>O<sub>5</sub>/graphene nanocomposite in addition to the improvement seen in the material due to the presence of graphene sheets.

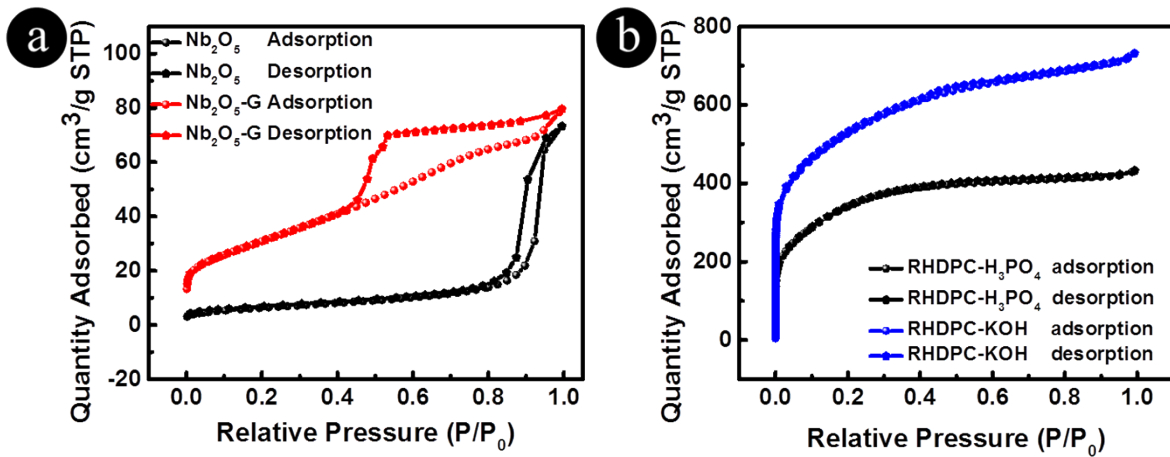

**Fig. S3** N<sub>2</sub> adsorption / desorption isotherms of (a) Nb<sub>2</sub>O<sub>5</sub> and Nb<sub>2</sub>O<sub>5</sub>/graphene, (b) RHDPC-KOH and RHDPC-H<sub>3</sub>PO<sub>4</sub>.

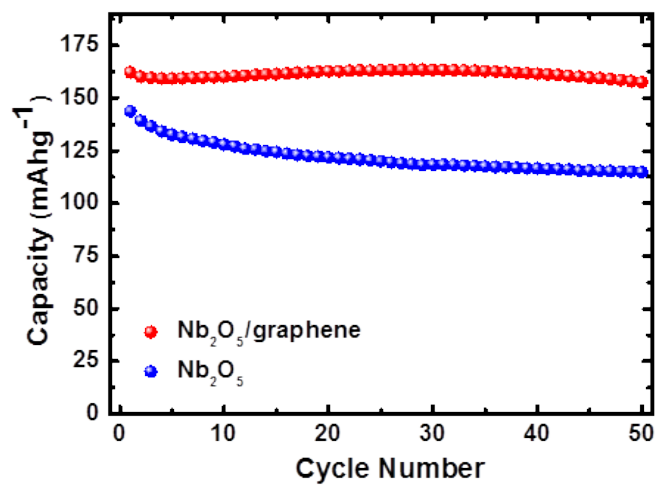

**Fig. S4** Discharge capacity vs. cycle number for Nb<sub>2</sub>O<sub>5</sub> and Nb<sub>2</sub>O<sub>5</sub>/graphene hybrid electrodes studied at 1 C rate.

The cycling stability of Nb<sub>2</sub>O<sub>5</sub> nanoparticles and Nb<sub>2</sub>O<sub>5</sub>/graphene composites were studied at 1C rate as well and is shown in the Fig. S4. In this experiment, the graphene nanocomposite showed higher capacity compared to pristine Nb<sub>2</sub>O<sub>5</sub> nanoparticles and gave a capacity of 160 mAhg<sup>-1</sup> as compared to 115 mAhg<sup>-1</sup> for pristine Nb<sub>2</sub>O<sub>5</sub> nanoparticles after 50 cycles under 1C rate.

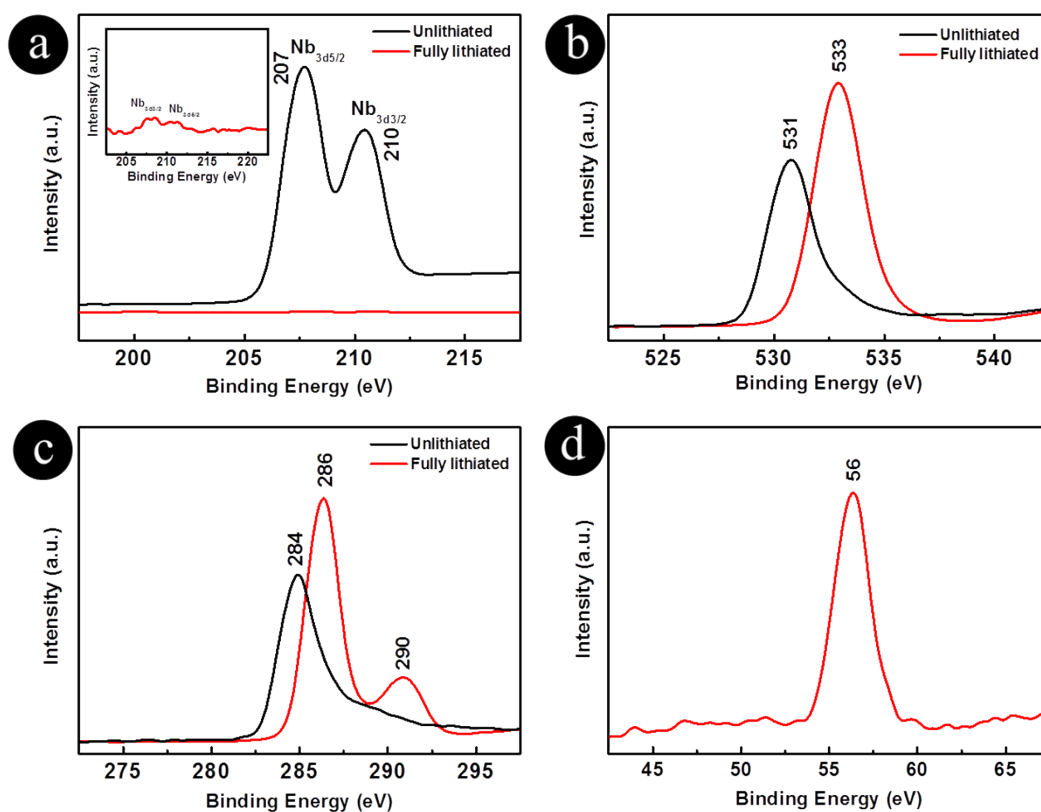

**Fig. S5** XPS spectra of lithiated and unlithiated Nb<sub>2</sub>O<sub>5</sub>/graphene composite (a) Nb<sub>3d</sub> (b) O<sub>1s</sub> (c) C<sub>1s</sub> and (d) Li<sub>1s</sub>

X-ray photoelectron spectroscopy was used to determine the oxidation states of the elements in the Nb<sub>2</sub>O<sub>5</sub>/graphene nanocomposite material. Core level XPS spectra of lithiated and unlithiated Nb<sub>2</sub>O<sub>5</sub>/graphene are shown in Fig. S5. Fig. S4a shows 3d<sub>3/2</sub> and 3d<sub>5/2</sub> peaks of Nb were seen at 210 eV and 207 eV respectively in the unlithiated sample whereas in the lithiated sample these peaks were absent. This is due to the fact that under lithiation Nb<sup>5+</sup> reduces to Nb<sup>4+</sup> state.<sup>1</sup> Fig. S5b showing the XPS spectra comparison of O<sub>1s</sub> indicates that the peak gets shifted from 531 eV to 533 eV as reported elsewhere.<sup>1</sup> The 1s peak of carbon in the pristine sample is seen near 284 eV in Fig. S5c whereas the XPS spectra in the lithiated samples resembles that of carbon containing functional groups. The presence of these peaks might be due to the slight oxidation of carbon in the graphene nanosheets and the presence of other functional groups in them. As XPS spectra only give an idea about the area that is investigated on, this anomaly could be a localized one. Finally Fig. S5d shows the XPS spectra of lithium in the lithiated sample which is at 56 eV.

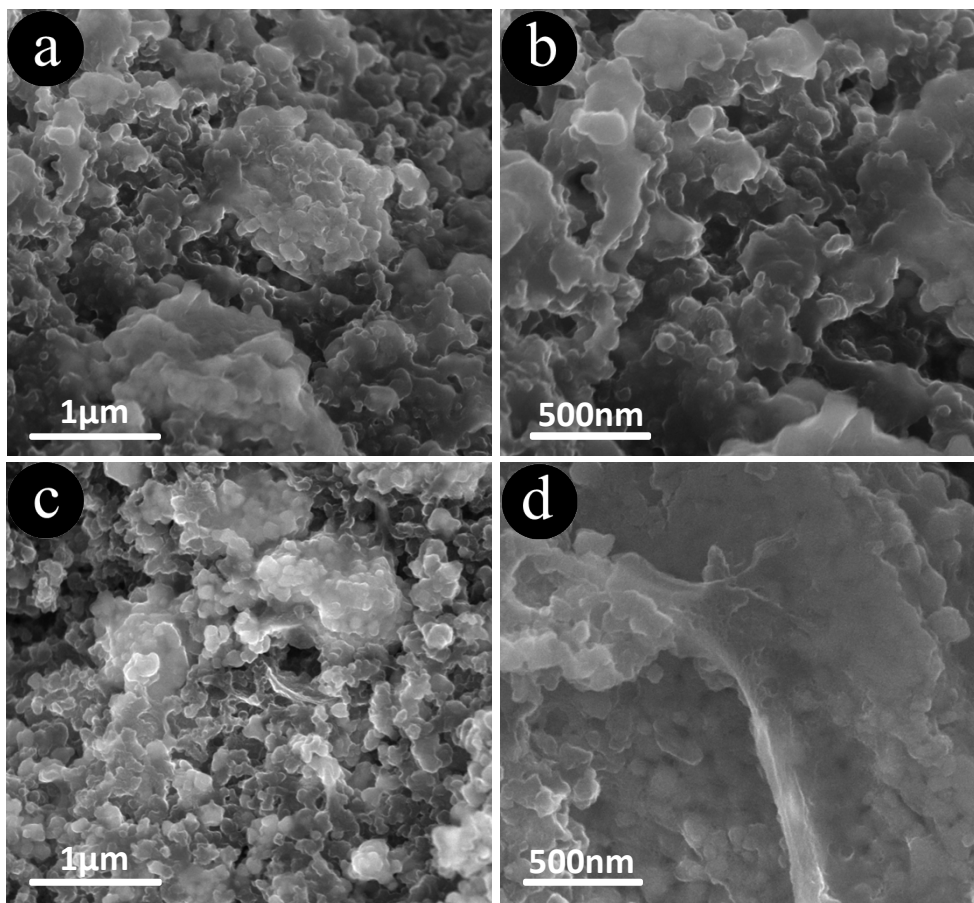

**Fig. S6** SEM images showing the nature of (a, b) pristine Nb<sub>2</sub>O<sub>5</sub> nanoparticles and (c, d) Nb<sub>2</sub>O<sub>5</sub>/graphene nanocomposite after battery cycling

Postmortem SEM imaging of pristine Nb<sub>2</sub>O<sub>5</sub> and Nb<sub>2</sub>O<sub>5</sub>/graphene nanocomposites were carried out to check the change in the morphologies of the electrode material and are shown in the Fig. S6. The cycled cells were cut open inside argon filled glove box and the electrodes were washed with diethyl carbonate to remove the electrolyte and the lithium salts. These were then dried in air at a temperature of 65°C. These were then loaded into the SEM sample holders for imaging. The images show a clustered form with the presence of graphene sheets in the nanocomposite. The highly agglomerated nature in both the samples is due to the presence of acetylene black and poly(vinylidene fluoride) that were used as conducting and non-conducting binders respectively during the electrode preparation. These images also show that Nb<sub>2</sub>O<sub>5</sub> nanoparticles had no morphological change after lithiation/delithiation cycles. These are due to the superior structural stability and near zero volume expansion of Nb<sub>2</sub>O<sub>5</sub> nanoparticles.

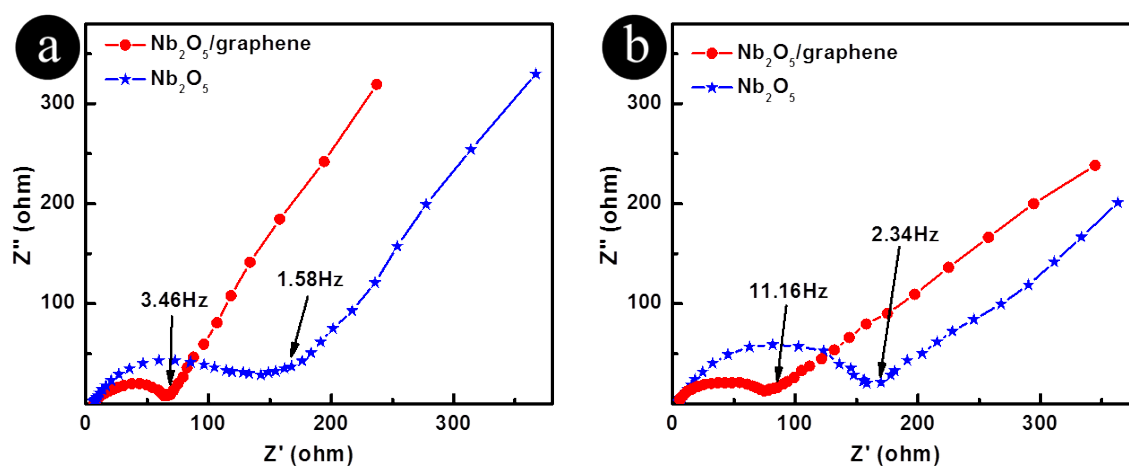

**Fig. S7** Frequency analysis of the pristine Nb<sub>2</sub>O<sub>5</sub> and Nb<sub>2</sub>O<sub>5</sub>/graphene hybrid electrode (a) before cycling and (b) after cycling.

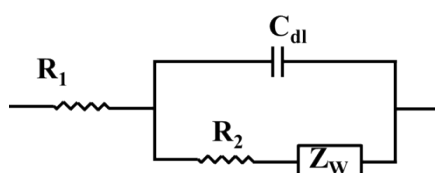

**Table S1:** Equivalent circuit components of pristine Nb<sub>2</sub>O<sub>5</sub> nanoparticles and Nb<sub>2</sub>O<sub>5</sub>/graphene nanocomposite before and after electrochemical cycling process.

| Sample                                                        | R <sub>1</sub> (Ω) | R <sub>2</sub> (Ω) | C <sub>dl</sub> (μF) | a <sub>1</sub> |
|---------------------------------------------------------------|--------------------|--------------------|----------------------|----------------|
| Pristine Nb <sub>2</sub> O <sub>5</sub><br>(Before cycling)   | 5.52               | 135.3              | 48.18                | 0.733          |
| Nb <sub>2</sub> O <sub>5</sub> /graphene<br>(Before cycling)  | 6.31               | 61.2               | 90.08                | 0.699          |
| Pristine Nb <sub>2</sub> O <sub>5</sub><br>(After 50 cycles)  | 4.836              | 150.9              | 27.09                | 0.794          |
| Nb <sub>2</sub> O <sub>5</sub> /graphene<br>(After 50 cycles) | 3.039              | 67.49              | 30.19                | 0.701          |



EIS analysis is done by applying the sinusoidal potential of 10 mV amplitude by varying the frequency from 40 kHz to 10 mHz and are shown in the Fig. S7. The kinetics of the sample can be determined from the frequency response of the sample in the EIS spectrum.<sup>2</sup> Higher the frequency at the onset between the slope and the semi-circle in the EIS spectrum, higher is the kinetics of the sample. From the analysis given below, it is clear Nb<sub>2</sub>O<sub>5</sub>/graphene nanocomposite has better kinetics as compared to pristine Nb<sub>2</sub>O<sub>5</sub> nanoparticles.

The equivalent circuit based on Randel's model was fitted from the Nyquist plots obtained in the EIS analysis of the samples using EC-Lab software V10.32.<sup>3</sup> R<sub>1</sub> represents the solution resistance, R<sub>2</sub> the charge transfer resistance, C<sub>dl</sub> the double layer capacitance, Z<sub>w</sub> the Warburg impedance and a<sub>2</sub> an empirical electrode roughness parameter.

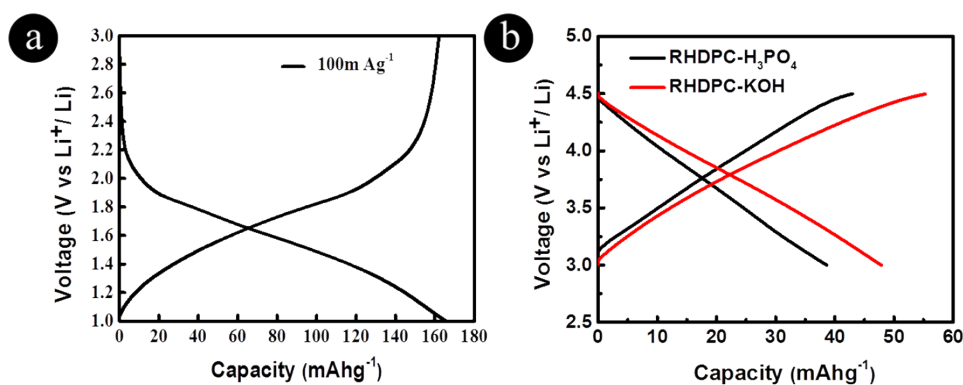

**Fig. S8** Galvanostatic charge-discharge curves of (a) Li/Nb<sub>2</sub>O<sub>5</sub>-graphene half-cells tested between 1-3 V, (b) Li/ RHDPC-KOH and Li/ RHDPC-H<sub>3</sub>PO<sub>4</sub> half-cells cycled between 3 - 4.5 V at constant current density of 100 mA g<sup>-1</sup>.

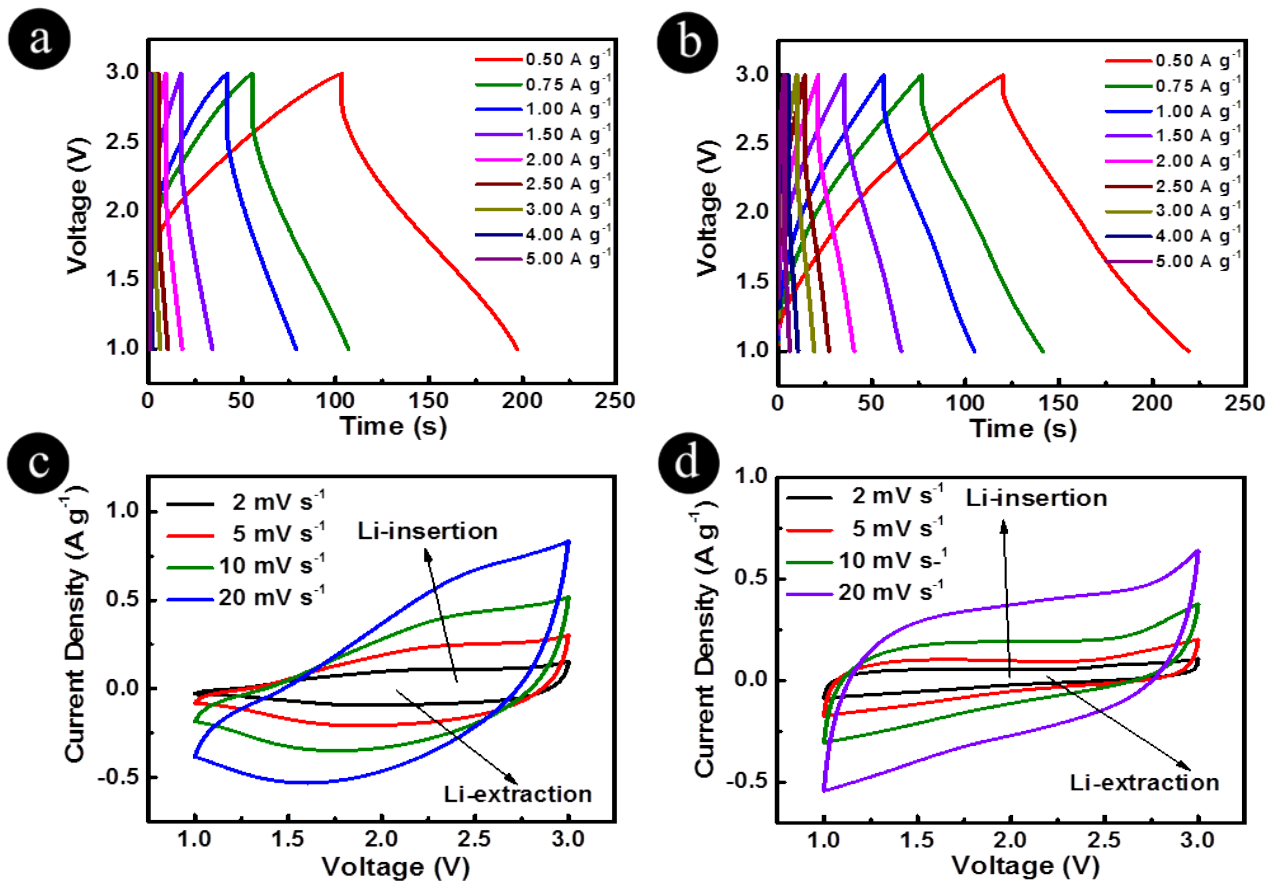

**Fig. S9** Galvanostatic charge-discharge curves of Li-HEC (a)  $\text{Nb}_2\text{O}_5 / \text{RHDPC- H}_3\text{PO}_4$  (b)  $\text{Nb}_2\text{O}_5 / \text{RHDPC - KOH}$  at different applied current densities. Cyclic Voltammetry of (c)  $\text{Nb}_2\text{O}_5 / \text{RHDPC- H}_3\text{PO}_4$  and (d)  $\text{Nb}_2\text{O}_5 / \text{RHDPC-KOH}$  cells.

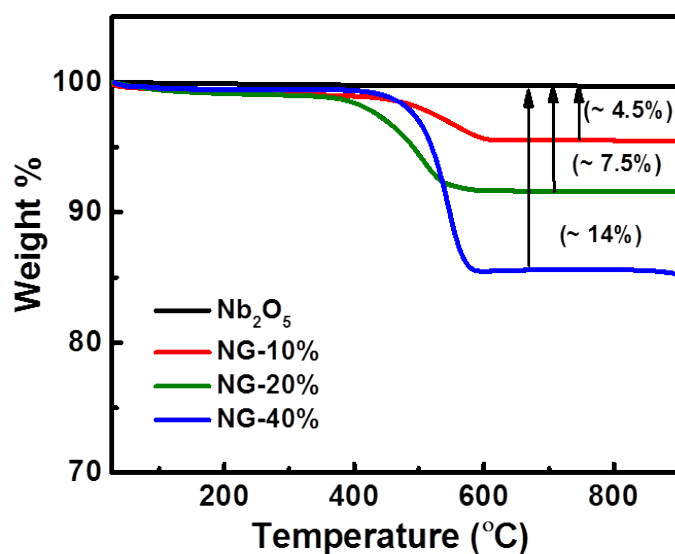

**Fig. S10** Thermogravimetric analysis of Nb<sub>2</sub>O<sub>5</sub> nanocrystals and Nb<sub>2</sub>O<sub>5</sub>/Graphene nanocomposite with varying graphene content.

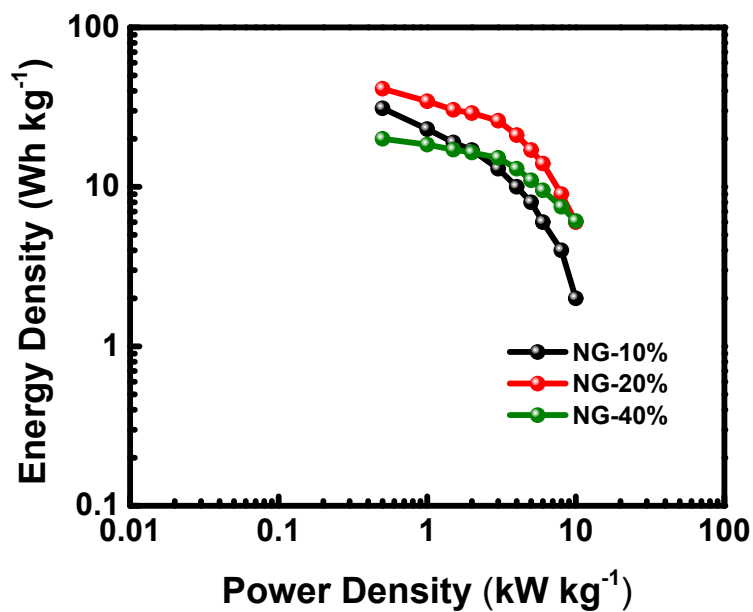

**Fig. S11** Ragone plot of Li-HEC device fabricated with Nb<sub>2</sub>O<sub>5</sub>-graphene / RHDPC-KOH electrodes (with varying graphene content).

## References

1. N. Kumagai, K. Tanno, T. Nakajima and N. Watanabe, *Electrochim. Acta*, 1983, 28, 17-22.
2. P. Meduri, H. Chen, J. Xiao, J. J. Martinez, T. Carlson, J.-G. Zhang and Z. D. Deng, *J. Mater. Chem. A*, 2013, 1, 7866-7869.
3. C. Ho, I. D. Raistrick and R. A. Huggins, *J. Electrochem. Soc.*, 1980, 127, 343-350.
